# Supplementary material for: Cupriavidus necator as flexible platform organism for trehalose production
Source: Research Square preprint supplement (doi:10.21203/rs.3.rs-7630680/v1), 2025-10-14
Supplement: Supplementary file 1 [file 4c9045ca4ada75a33de6ae32.xlsx]

## Sheet: Medium composition
Table 1: Standard minimal medium composition adapted from Sydow et al. . Solutions 1-3 and the salt solution were sterilized by autoclaving, whereas solutions 4 and 5, along with the antibiotic and inducer, were sterilized by filtration.
Stock solution	Components	Stock solution / g·L-1	Dilution factor	Final concentration solution / g·L-1
1	Na2HPO4	28.95	10	2.895
	NaH2PO4	30.6	10	3.06
2	K2SO4	1.7	10	0.17
	CaSO4 · 2 H2O	0.97	10	0.097
3	(NH4)2SO4	188	200	0.94
4	MgSO4 · 7 H2O	500	625	0.8
5*	FeSO4 · 7 H2O	15	2500	0.006
	MnSO4 · 7 H2O	2.4	2500	0.00096
	ZnSO4 · 7 H2O	2.4	2500	0.00096
	CuSO4 · 5 H2O	0.48	2500	0.000192
	Na2MoO4 · 2 H2O	1.8	2500	0.00072
	Ni2SO4 · 6 H2O	1.5	2500	0.0006
	CoSO4 · 7 H2O	0.04	2500	1.6e-05
Kanamycin	Kanamycin	50	170	0.294118
Inducer	3-methylbenzoic acid	1	3.3	0.30303
Salt	NaCl	300	15	20

## Sheet: Heterotrophic experiment
Autotrophic experiment
Induction time	21.1
Uhrzeit	Prozesszeit / h	Probe	OD - SF1	OD - SF2	OD - SF4	OD - SF5	OD - Mittlwert	CDW	OD - Standardabweichung	Trehalose / g∙L-1 - SF1	Trehalose / g∙L-1 - SF2	Trehalose / g∙L-1 - SF4	Trehalose / g∙L-1 - SF5	Trehalose - Mittelwert	Trehalose - Standardabweichung	Fructose / g∙L-1 - SF1	Fructose / g∙L-1 - SF2	Fructose / g∙L-1 - SF4	Fructose / g∙L-1 - SF5	Fructose - Mittelwert	Fructose - Standardabweichung
2025-03-06 10:45:00	0	1	0.304	0.241	0.234	0.226	0.25125	0.0912037	0.0309142	-	-	-	-	#DIV/0!	#DIV/0!	-	26.9417	26.7961	26.7338	26.8239	0.0871253
2025-03-06 12:30:00	1.75	2	0.214	0.205	0.209	0.19	0.2045	0.0742335	0.00895824	-	-	-	-	#DIV/0!	#DIV/0!	26.7951	26.8829	26.8507	26.6918	26.8051	0.0725854
2025-03-06 16:00:00	5.25	3	0.52	0.47	0.538	0.536	0.516	0.187308	0.0274591	-	-	-	-	#DIV/0!	#DIV/0!	27.1417	26.7483	26.5173	26.6438	26.7628	0.233563
2025-03-06 20:35:00	9.83333	4	0.95	1.05	1.41	1.295	1.17625	0.426979	0.184302	-	-	-	-	#DIV/0!	#DIV/0!	-	-	-	-	-	-
2025-03-07 07:05:00	20.3333	5	6.6	7.32	8.62	8.38	7.73	2.80599	0.815414	-	-	-	-	#DIV/0!	#DIV/0!	-	-	-	-	-	-
2025-03-07 08:05:00	21.3333	6	5.74	6.56	7.74	7.46	6.875	2.49562	0.787067	-	-	-	-	#DIV/0!	#DIV/0!	19.2657	19.2826	17.831	18.6652	18.7611	0.591799
2025-03-07 09:15:00	22.5	7	6.14	6.88	8.08	7.74	7.21	2.61723	0.756902	-	-	-	-	#DIV/0!	#DIV/0!	18.8898	19.0564	17.5659	18.3493	18.4654	0.581377
2025-03-07 11:40:00	24.9167	8	5.52	6.36	8.72	9.08	7.42	2.69346	1.51486	-	-	-	-	#DIV/0!	#DIV/0!	18.6828	18.3657	16.9861	17.7789	17.9534	0.645771
2025-03-07 13:45:00	27	9	6.18	7.06	8.36	7.78	7.345	2.66623	0.815153	0.0786651	0.0691302	0.0386765	0.0755115	0.0654958	0.0158606	17.4953	17.6253	16.0446	17.9587	17.281	0.733566
2025-03-07 19:15:00	32.5	10	6.58	7.36	8.38	8.18	7.625	2.76788	0.714195	0.438639	0.530634	0.4147	0.476362	0.465084	0.0437663	16.3416	15.8968	16.4984	16.188	16.2312	0.222076
2025-03-08 21:15:00	58.5	11	9.15	9.2	9.65	10.05	9.5125	3.45304	0.366359	3.25925	2.98636	2.68235	2.83504	2.94075	0.212995	8.48784	8.65149	9.02144	7.74012	8.47522	0.46636
2025-03-09 14:05:00	75.3333	12	9.9	9.85	10.35	10.6	10.175	3.69353	0.313249	4.67926	4.79619	3.55793	4.37312	4.35163	0.483578	5.0001	6.09387	4.69524	5.05722	5.21161	0.527632
2025-03-10 08:25:00	93.6667	13	10.85	9.65	9.85	10.95	10.325	3.74797	0.580409	5.86906	5.65222	4.74796	5.32593	5.39879	0.422573	3.16959	3.95274	3.08113	3.24442	3.36197	0.345942
2025-03-10 10:35:00	95.8333	14	10.4	9.75	10.4	10.8	10.3375	3.75251	0.376456	5.63772	5.23968	4.90284	5.70157	5.37045	0.322813	16.2542	16.9002	17.5896	17.155	16.9748	0.483551
2025-03-10 13:30:00	98.75	15	9.6	9.7	10.15	10.7	10.0375	3.64361	0.434993	5.74354	5.57964	4.70252	5.22667	5.31309	0.398937	14.3072	15.0859	16.1801	14.8625	15.1089	0.680335
2025-03-10 16:05:00	101.333	16	10.2	9.8	9.9	11.4	10.325	3.74797	0.637868	5.86867	5.68442	4.83681	5.31097	5.42522	0.394687	13.4258	13.9284	15.4635	14.0648	14.2206	0.756031
2025-03-11 09:10:00	118.417	17	10.2	10.9	9.8	13.35	11.0625	4.01569	1.37812	6.81839	6.51622	5.77752	5.56343	6.16889	0.515323	7.52865	9.06071	12.5367	8.02948	9.28888	1.95478
2025-03-11 10:10:00	119.417	18	10.4	11.4	9.8	13.95	11.3875	4.13366	1.58602	6.98071	6.60336	5.92582	5.54024	6.26253	0.56281	6.65678	8.25789	12.0405	9.23767	9.0482	1.95787
2025-03-11 14:00:00	123.25	19	11.9	10.9	9.3	13.55	11.4125	4.14274	1.54369	7.24996	6.85211	6.20052	5.55185	6.46361	0.646103	5.14646	6.77879	10.6067	5.15558	6.92188	2.2288
2025-03-12 09:40:00	142.917	20	8.65	10.15	8.85	13.65	10.325	3.74797	2.00421	7.85234	7.43148	7.34023	5.06553	6.9224	1.08932	1.56278	3.51258	7.44283	1.70995	3.55703	2.37119
2025-03-12 12:50:00	146.083	21	9.15	10.8	9.25	13.9	10.775	3.91133	1.91915	7.94406	7.76894	7.77744	4.9711	7.11539	1.23997	0.956282	2.93608	6.65647	1.16345	2.92807	2.28598
2025-03-13 09:30:00	166.75	22	7.35	8.9	9.75	13.4	9.85	3.57555	2.22289	7.85647	8.00886	9.00754	4.07606	7.23724	1.87789	0.289545	0.911344	3.98716	0.129421	1.32937	1.56202

## Sheet: Autotrophic experiment
Autotrophic experiment
Induction time	44.8
Uhrzeit	Prozesszeit / h	Probe	OD - SF1	OD - SF2	OD - SF4	OD - SF5	OD - Mittlwert	CDW	OD - Standardabweichung	Trehalose / g∙L-1 - SF1	Trehalose / g∙L-1 - SF2	Trehalose / g∙L-1 - SF4	Trehalose / g∙L-1 - SF5	Trehalose - Mittelwert	Trehalose - Standardabweichung	Fructose / g∙L-1 - SF1	Fructose / g∙L-1 - SF2	Fructose / g∙L-1 - SF4	Fructose / g∙L-1 - SF5	Fructose - Mittelwert	Fructose - Standardabweichung
2025-01-11 13:00:00	0	Prozessstart	-	0	0	0	0	0	0	-	-	-	-	#DIV/0!	#DIV/0!	-	26.9417	26.7961	26.7338	26.8239	0.0871253
2025-01-11 13:15:00	0.25	0	-	0	0	0	0	0	0	-	-	-	-	#DIV/0!	#DIV/0!	26.7951	26.8829	26.8507	26.6918	26.8051	0.0725854
2025-01-11 16:30:00	3.5	1	0.255	0.296	0.269	0.31	0.2825	0.102547	0.0216622	-	-	-	-	#DIV/0!	#DIV/0!	27.1417	26.7483	26.5173	26.6438	26.7628	0.233563
2025-01-12 11:20:00	22.3333	2	1.73	1.45	1.25	1.55	1.495	0.542685	0.173421	-	-	-	-	#DIV/0!	#DIV/0!	-	-	-	-	-	-
2025-01-13 07:40:00	42.6667	3	5.28	3.98	4.42	3.6	4.32	1.56816	0.62562	-	-	-	-	#DIV/0!	#DIV/0!	-	-	-	-	-	-
2025-01-13 08:40:00	43.6667	4	5.04	3.9	4.38	0	3.33	1.20879	1.96471	-	-	-	-	#DIV/0!	#DIV/0!	19.2657	19.2826	17.831	18.6652	18.7611	0.591799
2025-01-13 09:10:00	44.1667	5	4.98	4	4.74	4.04	4.44	1.61172	0.428719	-	-	-	-	#DIV/0!	#DIV/0!	18.8898	19.0564	17.5659	18.3493	18.4654	0.581377
2025-01-13 09:40:00	44.6667	6	4.94	4.14	5.22	4.3	4.65	1.68795	0.44486	-	-	-	-	#DIV/0!	#DIV/0!	18.6828	18.3657	16.9861	17.7789	17.9534	0.645771
2025-01-13 10:00:00	45	7	4.26	3.26	4.64	3.8	3.99	1.44837	0.515849	-	-	-	-	#DIV/0!	#DIV/0!	17.4953	17.6253	16.0446	17.9587	17.281	0.733566
2025-01-13 12:25:00	47.4167	8	5.14	4.54	5.86	5.14	5.17	1.87671	0.467654	-	-	-	-	#DIV/0!	#DIV/0!	16.3416	15.8968	16.4984	16.188	16.2312	0.222076
2025-01-13 14:05:00	49.0833	9	5.78	4.64	6.16	5.62	5.55	2.01465	0.560803	0.0308145	0.0167427	0	0	0.0118893	0.00703587	8.48784	8.65149	9.02144	7.74012	8.47522	0.46636
2025-01-13 16:05:00	51.0833	10	6.02	6.84	6.52	7.96	6.835	2.4811	0.712232	0.185856	0	0.124362	0	0.0775545	0.0929282	5.0001	6.09387	4.69524	5.05722	5.21161	0.527632
2025-01-14 07:40:00	66.6667	11	6.4	4.94	7.24	7.08	6.415	2.32864	0.908116		0.0113561	0.00297672	0	0.00477762	0	3.16959	3.95274	3.08113	3.24442	3.36197	0.345942
2025-01-14 09:10:00	68.1667	12	6.48	5.04	7.7	7.24	6.615	2.40124	1.0083	1.49989	0.801239	1.69721	2.01205	1.5026	0.349326	16.2542	16.9002	17.5896	17.155	16.9748	0.483551
2025-01-14 10:50:00	69.8333	13	6.64	5.18	7.88	7.48	6.795	2.46659	1.03425	-	-	-	-	-	-	14.3072	15.0859	16.1801	14.8625	15.1089	0.680335
2025-01-14 13:10:00	72.1667	14	6.78	5.42	8.12	7.7	7.005	2.54282	1.03551	1.62081	0.854598	1.89287	2.26043	1.65718	0.383104	13.4258	13.9284	15.4635	14.0648	14.2206	0.756031
2025-01-14 14:35:00	73.5833	15	6.88	4.96	8.26	8.94	7.26	2.63538	1.52125	1.62457	-	-	-	1.62457	0	7.52865	9.06071	12.5367	8.02948	9.28888	1.95478
2025-01-14 17:10:00	76.1667	16	6.62	5.26	8.36	7.86	7.025	2.55007	1.19986	1.70062	0.911953	2.16607	2.4546	1.80831	0.394334	6.65678	8.25789	12.0405	9.23767	9.0482	1.95787
2025-01-15 07:35:00	90.5833	17	7.86	6.5	9.38	9.04	8.195	2.97479	1.12955	1.833	1.01449	2.54247	3.01715	2.10178	0.409255	5.14646	6.77879	10.6067	5.15558	6.92188	2.2288
2025-01-15 09:25:00	92.4167	18	7.96	6.94	9.48	9.44	8.455	3.06916	1.06784	1.83488	1.00055	2.57742	3.09538	2.12706	0.417166	1.56278	3.51258	7.44283	1.70995	3.55703	2.37119
2025-01-15 10:40:00	93.6667	19	7.52	6.62	10.62	9.54	8.575	3.11272	1.58495	1.76776	0.984432	2.47385	2.97565	2.05042	0.391664	0.956282	2.93608	6.65647	1.16345	2.92807	2.28598
2025-01-15 13:50:00	96.8333	20	8.06	6.92	9.5	9.36	8.46	3.07098	1.05157	1.89943	1.05233	2.558	3.13723	2.16175	0.423546	0.289545	0.911344	3.98716	0.129421	1.32937	1.56202
2025-01-15 16:30:00	99.5	21	8.12	7.52	10.28		8.64	3.13632	1.18524	1.93574	1.10579	2.59295	3.1877	1.52077	0.414974	-	-	-	-	#DIV/0!	#DIV/0!
2025-01-16 07:10:00	114.167	22	9.05	7.6	11.6	10.25	9.625	3.49388	1.47669	2.17433	1.5265	2.75907	3.3421	1.85042	0.323915	-	-	-	-	#DIV/0!	#DIV/0!
2025-01-16 09:25:00	116.417	23	9.3	8.75	12.6	11.25	10.475	3.80242	1.53887	-	-	-	-	-	-	-	-	-	-	#DIV/0!	#DIV/0!
2025-01-16 13:15:00	120.25	24	9.15	8.45	12.3	10.45	10.0875	3.66176	1.46517	-	-	-	-	-	-	-	-	-	-	#DIV/0!	#DIV/0!
2025-01-17 07:05:00	138.083	25	8.75	7.8	12.05	9.7	9.575	3.47573	1.57896	2.28	-	-	-	2.28	0	-	-	-	-	#DIV/0!	#DIV/0!
2025-01-17 09:15:00	140.25	26	8.95	8.05	12.5	11.25	10.1875	3.69806	1.77319	2.29	1.69	-	-	1.99	0.3	-	-	-	-	#DIV/0!	#DIV/0!
2025-01-17 10:20:00	141.333	27	7.8	6.86	10.86	8.6	8.53	3.09639	1.47949	2.296	1.7	-	-	1.998	0.298	-	-	-	-	#DIV/0!	#DIV/0!
2025-01-17 11:05:00	142.083	28	7.78	7.02	12.45	8.68	8.9825	3.26065	2.08641	2.31856	1.70472	2.82553	3.37842	2.01164	0.306916	-	-	-	-	#DIV/0!	#DIV/0!
2025-01-17 13:20:00	144.333	29	9.1	8.25	12.2	8.85	9.6	3.4848	1.53256	2.31747	1.67084	2.78968	3.36688	1.99415	0.323313	-	-	-	-	#DIV/0!	#DIV/0!

## Sheet: Formatotrophic experiment
Formatotrophic experiment
Induction time	44.3
Uhrzeit	Prozesszeit / h	Probe	OD - SF1	OD - SF2	OD - SF4	OD - SF5	OD - Mittlwert	CDW	OD - Standardabweichung	Trehalose / g∙L-1 - SF1	Trehalose / g∙L-1 - SF2	Trehalose / g∙L-1 - SF4	Trehalose / g∙L-1 - SF5	Trehalose - Mittelwert	Trehalose - Standardabweichung	Formiat / g∙L-1 - SF1	Formiat / g∙L-1 - SF2	Formiat / g∙L-1 - SF4	Formiat / g∙L-1 - SF5	Formiat - Mittelwert	Formiat - Standardabweichung
2024-08-12 11:57:00	0	1	0.134	0.118	0.11	0.113	0.11875	0.0431062	0.00925675					#DIV/0!	#DIV/0!					#DIV/0!	#DIV/0!
2024-08-12 14:00:00	2.05	2	0.141	0.13	0.12	0.108	0.12475	0.0452842	0.0121937					#DIV/0!	#DIV/0!	5.2276	5.06872	4.55322	4.61656	4.86653	0.288052
2024-08-12 15:08:00	3.18333	3	0.136	0.215	0.115	0.101	0.14175	0.0514552	0.0440873					#DIV/0!	#DIV/0!	5.68646	4.99653	5.12746	4.92338	5.18346	0.299471
2024-08-12 15:52:00	3.91667	4	0.141	0.145	0.127	0.108	0.13025	0.0472808	0.0144806					#DIV/0!	#DIV/0!	5.39071	5.2032	5.10691	4.8478
2024-08-12 19:37:00	7.66667	5	0.153	0.217	0.21	0.161	0.18525	0.0672457	0.0284989					#DIV/0!	#DIV/0!	4.81506	4.24619	4.38055	4.51654
2024-08-13 07:46:00	19.8167	6	0.463	0.475	0.632	0.527	0.52425	0.190303	0.0666985					#DIV/0!	#DIV/0!	0.160046	0.294597	0.200964	0.167913	0.20588	0.0534723
2024-08-13 09:05:00	21.1333	7	0.48	0.545	0.735	0.57	0.5825	0.211448	0.0939747					#DIV/0!	#DIV/0!	0	0	0	0	0	0
2024-08-13 11:00:00	23.05	8	0.475	0.53	0.735	0.58	0.58	0.21054	0.0968891					#DIV/0!	#DIV/0!	2.12506	0.686537	0.200661	0.667183	0.919861	0.722503
2024-08-13 14:00:00	26.05	9	0.655	0.795	1.105	0.89	0.86125	0.312634	0.163683					#DIV/0!	#DIV/0!	3.12135	1.85361	1.02087	2.22966	2.05637	0.754584
2024-08-13 15:30:00	27.55	10	0.88	0.93	1.4	1.08	1.0725	0.389317	0.202901					#DIV/0!	#DIV/0!	2.80012	1.25931	2.19868	3.65335	2.47786	0.872987
2024-08-13 19:00:00	31.05	11	1.13	1.22	1.78	1.37	1.375	0.499125	0.249048					#DIV/0!	#DIV/0!	3.29386	1.78264	0.888106	2.38709	2.08792	0.877003
2024-08-14 07:44:00	43.7833	12	3.14	2.66	4.54	4.19	3.6325	1.3186	0.762016					#DIV/0!	#DIV/0!					#DIV/0!	#DIV/0!
2024-08-14 10:45:00	46.8	13	3.46	2.75	4.93	4.69	3.9575	1.43657	0.892731				0.0150662	0.0150662	#DIV/0!	0.369945	0	0	0.126345	0.124073	0.151035
2024-08-14 12:32:00	48.5833	14	3.7	2.96	5.5	5.1	4.315	1.56634	1.02892				0	0	#DIV/0!	1.16062	0.628965	0.243262	1.16317	0.799005	0.387669
2024-08-14 14:56:00	50.9833	15	3.89	3.08	5.62	5.48	4.5175	1.63985	1.07262	0.00354179	0.0341047	0.0440208	0.0530956	0.0336907	0.0152815	2.17699	0.98581	0.467799	0.862976	1.12339	0.637695
2024-08-14 19:50:00	55.8833	16	4.22	3.26	6.54	6.28	5.075	1.84223	1.38053	0.0453045	0.129169	0.205143	0.179084	0.139675	0.0419324	1.94229	1.02062	0.501608	0.797801	1.06558	0.538611
2024-08-15 07:54:00	67.95	17	4.76	3.42	7.56	7.6	5.835	2.1181	1.80822	0.180178	0.375323	0.767027	0.603786	0.481578	0.0975726	3.06977	1.66353	1.25072	1.69147	1.91887	0.687006
2024-08-15 10:50:00	70.8833	18	4.8	3.66	7.72	7.7	5.97	2.16711	1.78609	0.221334	0.438153	0.912191	0.716519	0.572049	0.108409	3.56252	1.84204	1.34925	1.87866	2.15812	0.83735
2024-08-15 13:08:00	73.1833	19	4.74	3.48	7.94	7.72	5.97	2.16711	1.91418	0.243572	0.478757	1.00218	0.775365	0.624969	0.117593	3.40144	1.7668	1.19601	1.70177	2.01651	0.829561
2024-08-15 15:34:00	75.6167	20	4.68	3.48	8.04	7.68	5.97	2.16711	1.94121	0.260683	0.500812	1.06433	0.838126	0.665987	0.120065	3.17919	1.69501	1.18479	1.77077	1.95744	0.740505
2024-08-16 07:45:00	91.8	21	5.1	3.84	8.5	7.68	6.28	2.27964	1.88643	0.338192	0.616919	1.3109	0.991736	0.814436	0.139364	4.58862	2.47566	1.76897	2.99044	2.95592	1.03759
2024-08-16 08:45:00	92.8	22	4.46	3.56	7.92	7.08	5.755	2.08906	1.79846	0.372417	0.63451	1.36274	1.0408	0.852616	0.131047	5.69611	2.71661	2.11126	3.77637	3.57509	1.3619
2024-08-16 09:45:00	93.8	23	4.52	3.56	7.78	7.06	5.73	2.07999	1.74244	0.37177	0.637577	1.36018	1.03079	0.504673	0.132904	5.87627	2.74319	2.1358	4.01342	4.30973	1.43146
2024-08-16 10:45:00	94.8	24	4.64	3.56	7.94	7.38	5.88	2.13444	1.83123	0.373299	0.614698	1.3677	1.04434	0.493998	0.1207	6.15314	2.85344	2.18442	4.20104	4.50329	1.51616
2024-08-16 11:45:00	95.8	25	4.36	3.46	7.6	7.06	5.62	2.04006	1.7498	0.36942	0.625127	1.31773	0.995906	0.497274	0.127853	6.3544	2.95456	2.328	4.45662	4.65448	1.55226
2024-08-16 13:45:00	97.8	26	4.04	3.34	6.82	6.82	5.255	1.90757	1.58445	0.375683	0.623947	1.32888	1.00272	0.499815	0.124132	7.1879	3.3818	2.79884	5.25125	5.28485	1.72028
2024-08-16 13:45:00	97.8	27	3.86	3.08	7.42	6.38	5.185	1.88215	1.77552	0.373043	0.621499	1.33399	0.99481	0.497271	0.124228	7.67739	3.61142	2.98115	5.68662	5.64441	1.84684
2024-08-16 16:25:00	100.467	28	3.86	3.06	7.02	6.32	5.065	1.83859	1.64842		0.635043			0.635043	0	8.70131	3.96155	3.34849	6.45328	6.33143	2.12715
2024-08-17 09:10:00	117.217	29	3.82	3.04	6.8	6.06	4.93	1.78959	1.54742	0.399485	0.664811	1.41237	1.04261	0.532148	0.132663	4.69482	0.279146	0.244039	1.34224	2.48698	1.81805
2024-08-18 20:30:00	152.55	30	3.3	2.46	5.42	4.92	4.025	1.46108	1.19602	0.417738	0.68174	1.45465	1.04898	0.549739	0.132001	25.7018	12.5883	5.60961	22.1209	19.1451	7.90839
2024-08-19 09:55:00	165.967	31	3.08	2.48	5.42	5.02	4	1.452	1.24635	0.432288	0.690318	1.45374	1.03786	0.561303	0.129015	36.5414	19.2253	8.35801	32.2009	27.8833	11.0904
